# Supplementary material
Source: MDPI journal article supplement (https://www.mdpi.com/2225-1154/10/4/51)
Supplement: s1 [file s1 › climate-1619762-supplementary.pdf]

## Figures in Supplementary Material

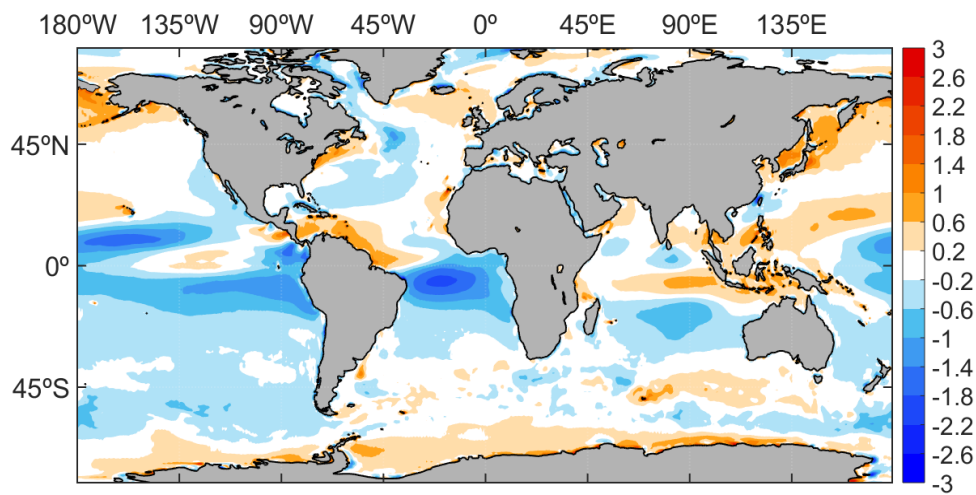

Figure S1. Absolute differences between EC-EARTH and ERA5 for the annual mean  $U_{10}$  (m/s) for the present climate (1995-2014).

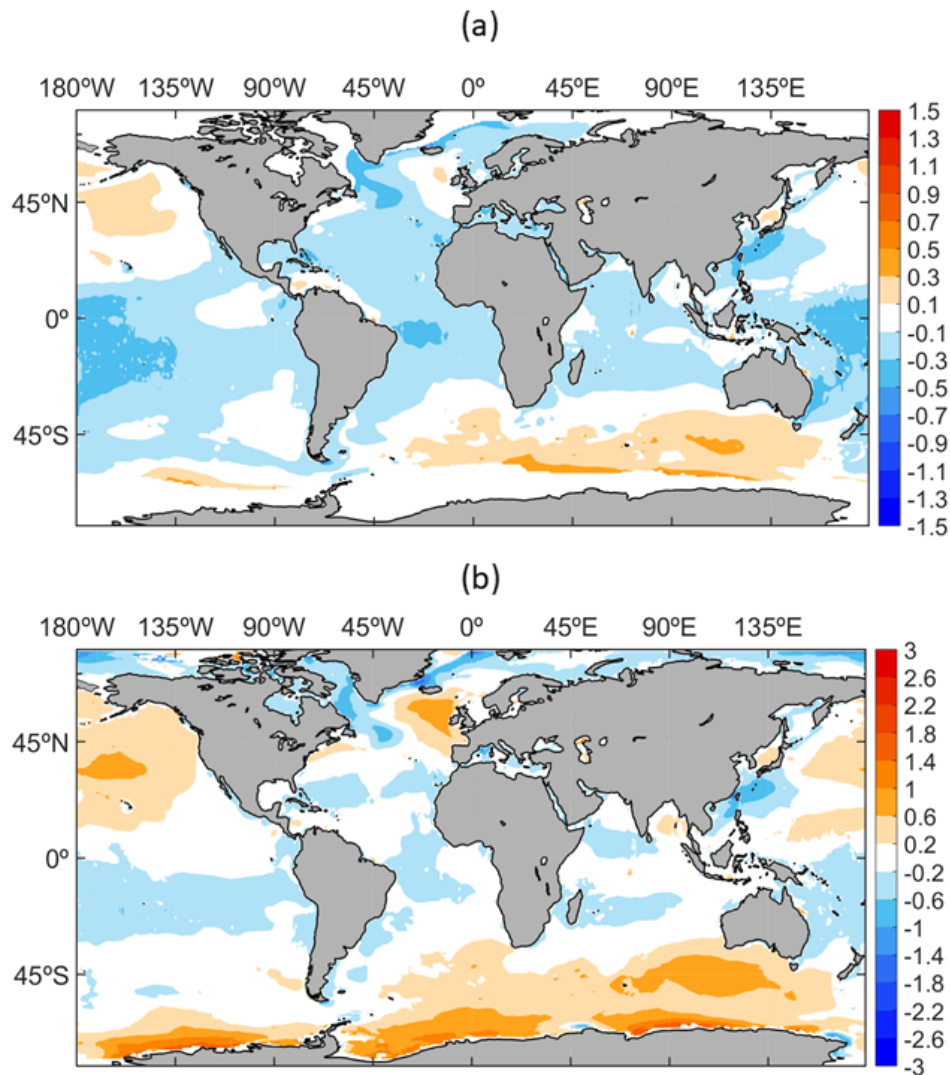

Figure S2. Mean absolute differences between present climate historical ensemble (PC20-E; 1995-2014) and ERA5 for (a)  $H_s$  (m) and (b) 95% percentile  $H_s$  (m).

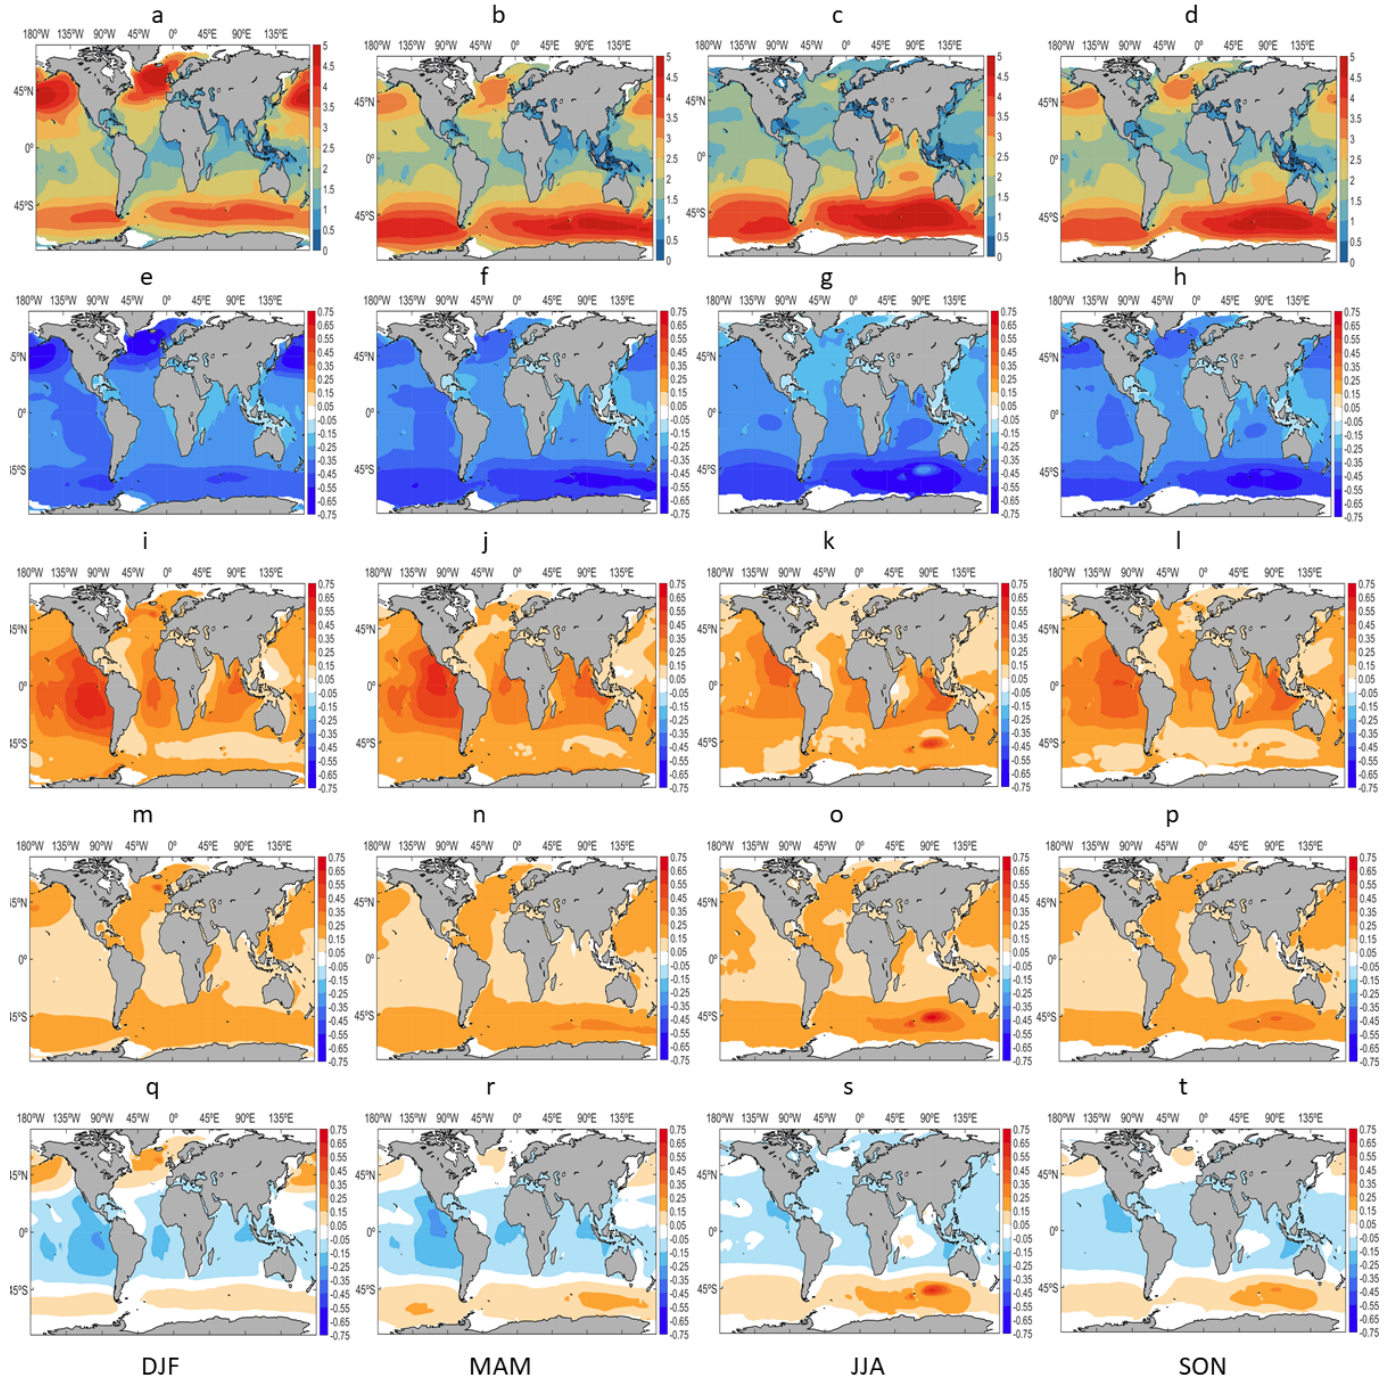

Figure S3. Seasonal global ensemble means of  $H_s$  (m) for PC20-E (a-d) and the anomaly from the ensemble mean for (e-h) PC20-ST2, (i-l) PC20-ST3, (m-p) PC20-ST4 and (q-t) PC20-ST6.

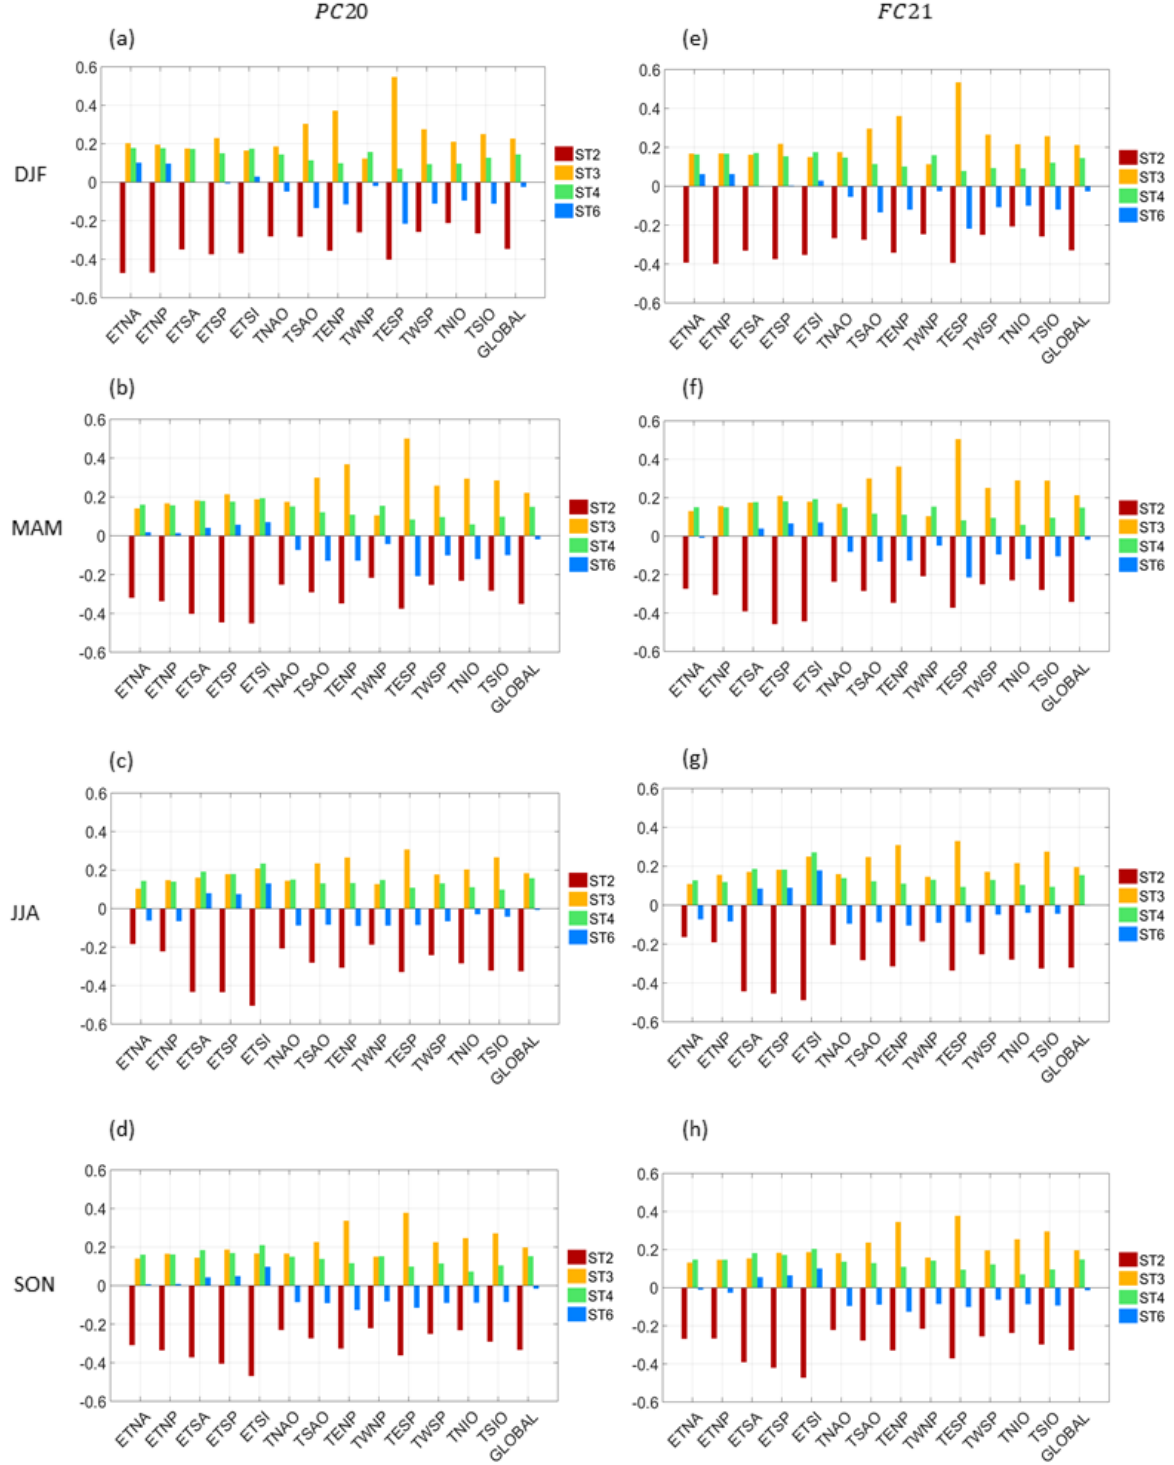

Figure S4. Seasonal mean anomalies of ST2, ST3, ST4 and ST6 from its ensemble mean (PC20-E (a-d) and FC21-E (e-h)) for global and 13 sub regions during DJF (a and e), MAM (b and f), JJA (c and g) and SON (d and h) for  $H_S$ .

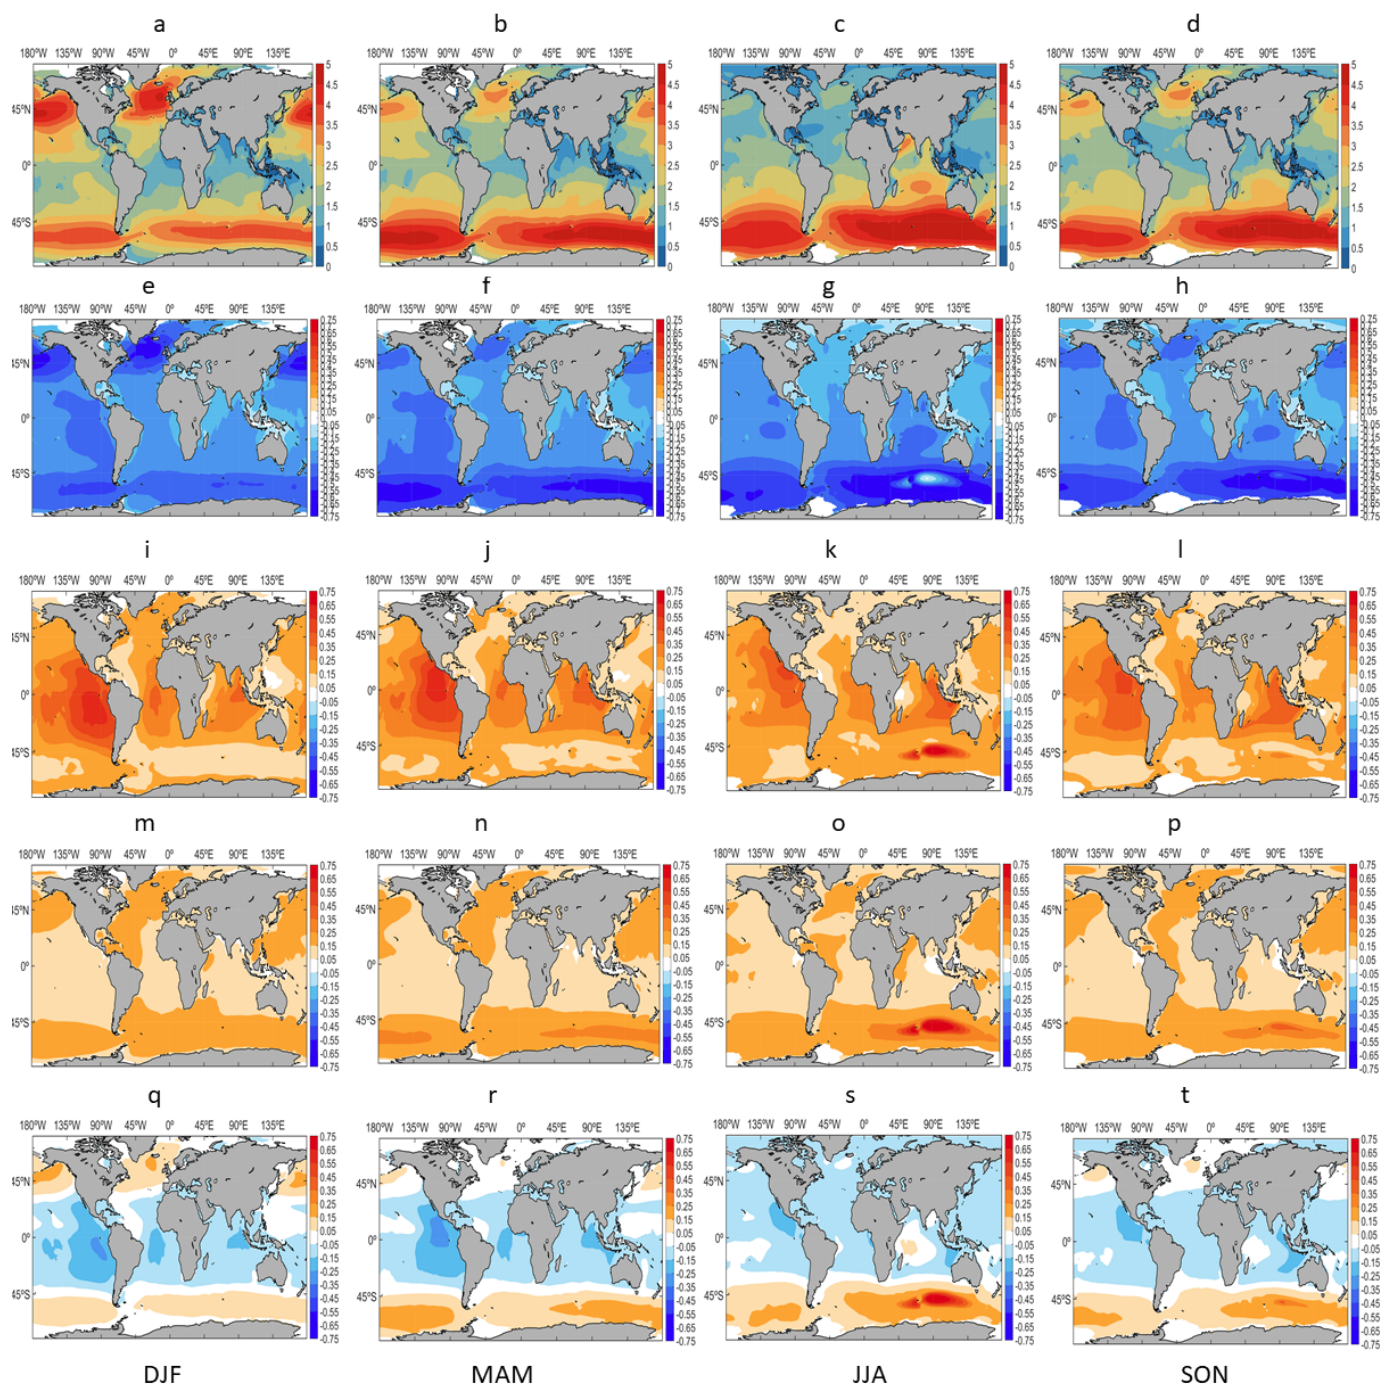

Figure S5. Same as Figure S3, but for FC21.

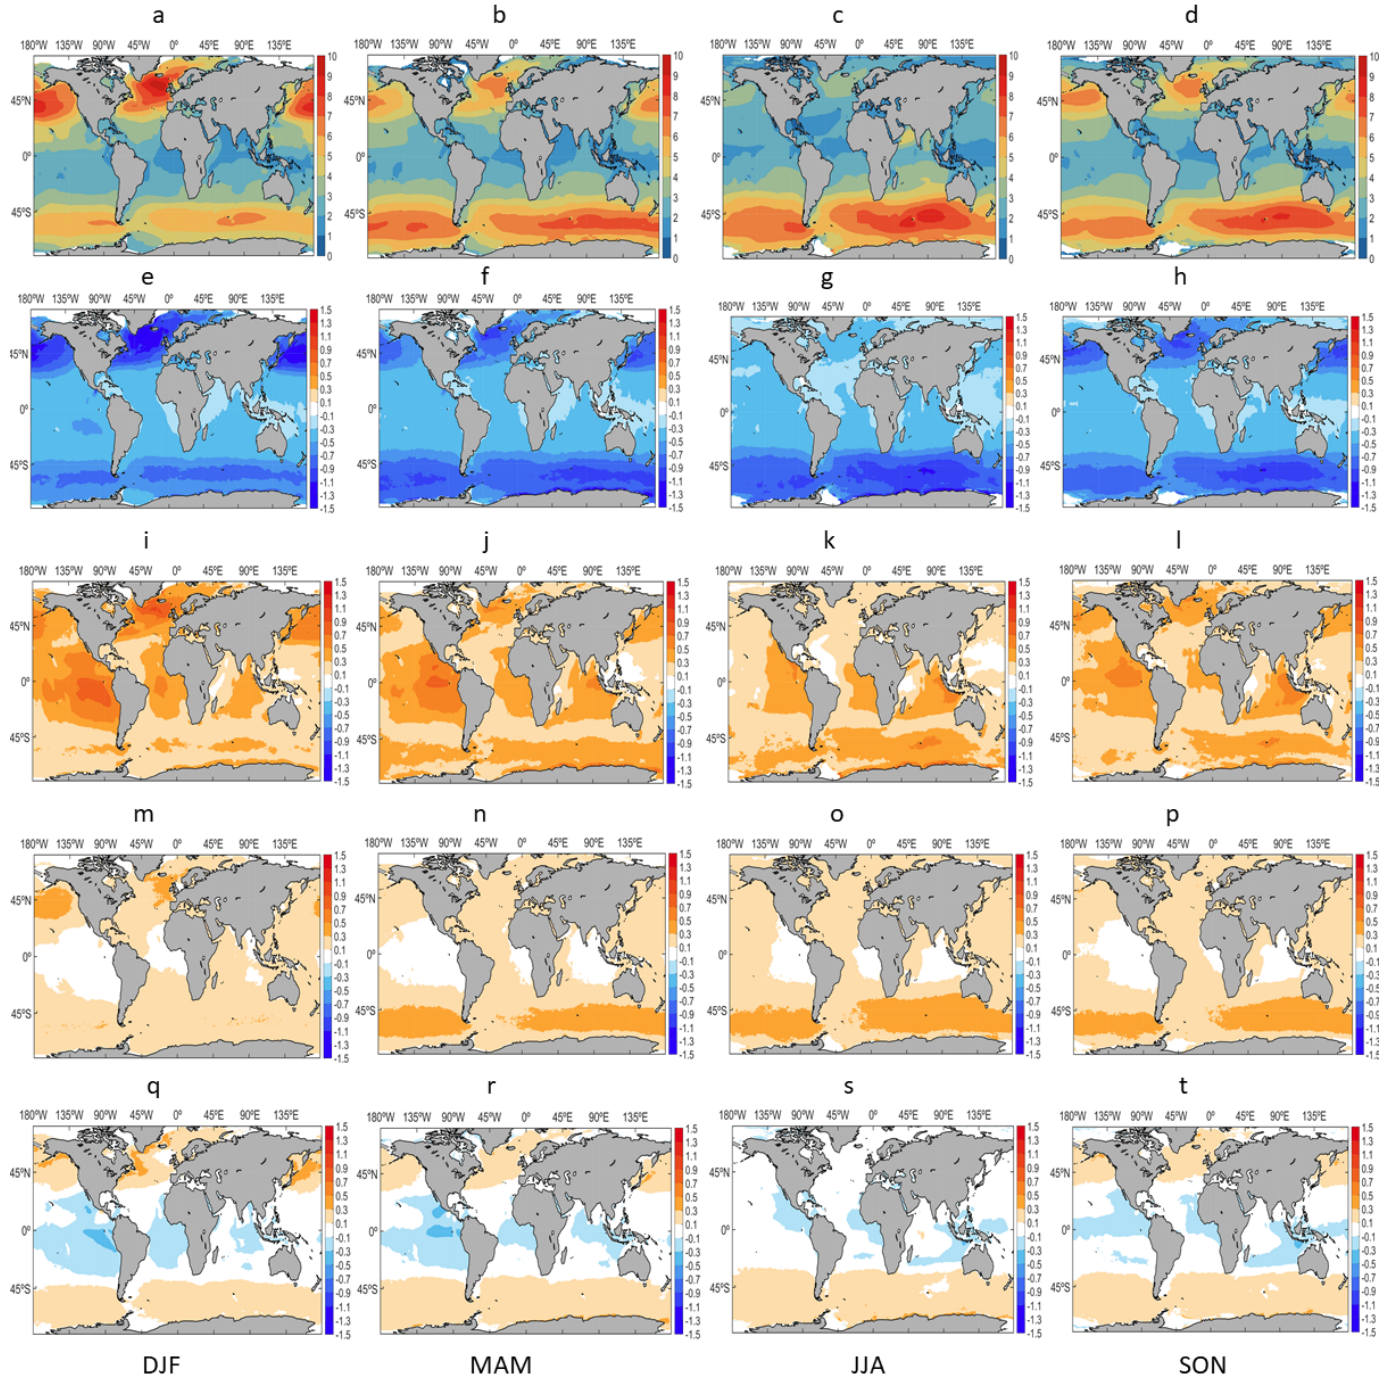

Figure S6. Same as Figure S3, but for  $H_s^{95}$ .

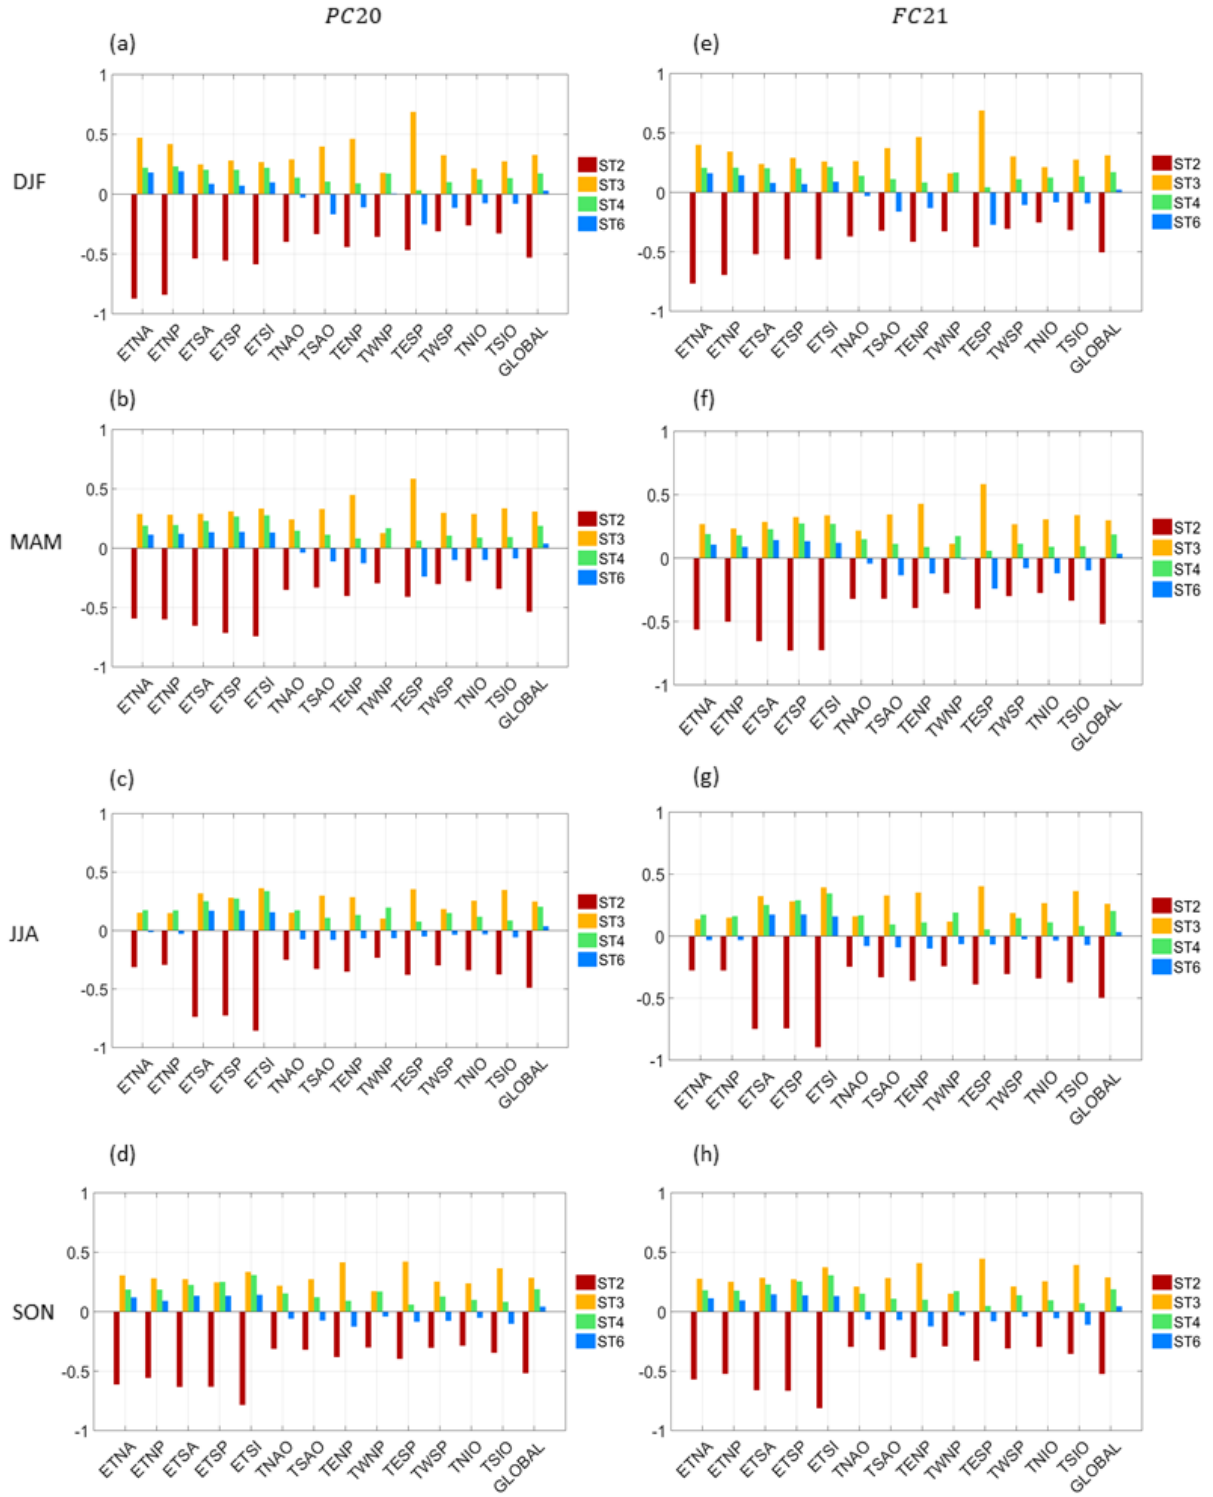

Figure S7. Same as Figure S4, but for  $H_s^{95}$ .

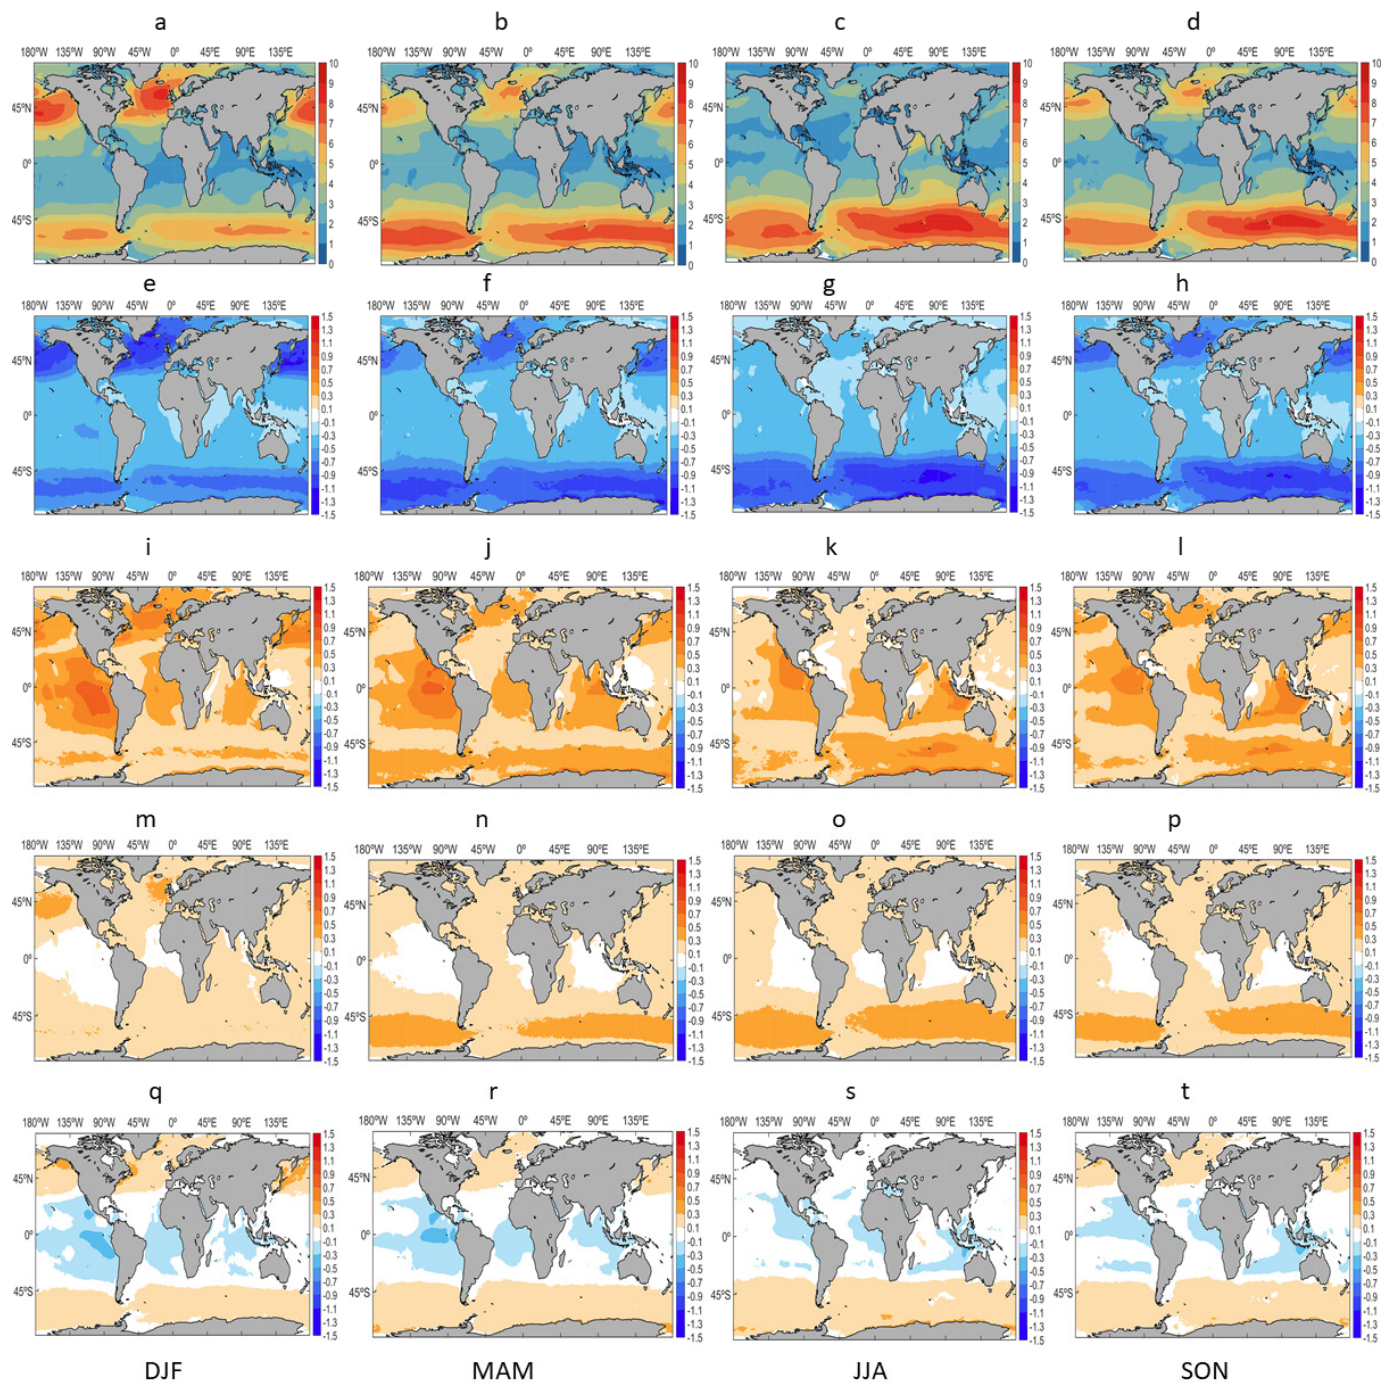

Figure S8. Same as FigureS5, but for  $H_s^{95}$ .

## Tables in Supplementary Material

Table S1. A brief description of the main differences in the different source term packages (ST2/3/4/6) used in this study.

| Source Term Package | $S_{in}$                                                                                                                                                                                                                                                                                                                                                   | $S_{ds}$                                                                                                                                                                                                                                                                                                                                                     |
|---------------------|------------------------------------------------------------------------------------------------------------------------------------------------------------------------------------------------------------------------------------------------------------------------------------------------------------------------------------------------------------|--------------------------------------------------------------------------------------------------------------------------------------------------------------------------------------------------------------------------------------------------------------------------------------------------------------------------------------------------------------|
| <b><u>ST2:</u></b>  | The wind input term in this package uses a non-dimensional wind-wave interaction parameter based on sea surface drag coefficient, which is capped at $2.5 \times 10^{-3}$ .                                                                                                                                                                                | <p>Dissipation term consists of two separate terms for both the low and high frequency waves.</p> <p>The (dominant) low-frequency constituent is based on energy dissipation due to turbulence.</p> <p>Overestimation of swell dissipation.</p>                                                                                                              |
| <b><u>ST3:</u></b>  | <p>Wind input term is a function of wave supported stress.</p> <p>Added a negative part in the wind input term to represent the liner damping of swell waves.</p> <p>Require a re-tuning of source term coefficients (such as BETAMAX) for different wind products.</p>                                                                                    | <p>The generic form of the WAM4 dissipation term is used</p> <p>Unfortunately, these parameterizations are sensitive to swell.</p> <p>An increase in swell height typically reduces dissipation at the wind-sea peak and increase dissipation at high frequencies.</p>                                                                                       |
| <b><u>ST4:</u></b>  | <p>Positive part of the wind input term is taken from ST3.</p> <p>Added an ad hoc reduction of frictional velocity is implemented to allow a balance with a saturation-based dissipation of waves.</p> <p>This correction also reduces the drag coefficient at high winds.</p>                                                                             | <p>A dissipation function without any prescribed spectral shape.</p> <p>Dissipation of swell over long distances are due to air friction.</p> <p>A low bias for <math>H_s &gt; 8</math> m when tested at global scale using ECMWF winds.</p>                                                                                                                 |
| <b><u>ST6:</u></b>  | <p>The positive part of the wind input is based on measurements and the negative wind input term is based on laboratory testing.</p> <p>Bulk adjustment to the wind field can be achieved by re-scaling the drag parameterization through namelist parameter. This has a similar effect to tuning the BETAMAX parameter in ST3/4 source term packages.</p> | <p>Whitecapping dissipation source terms are based on measurements and Wave-turbulence dissipation is based on laboratory experiments and field observations of swell decay.</p> <p>Dissipation of swell are due to the interaction of ocean turbulence.</p> <p>Swell will transfer energy into the ocean when they dissipate (not to the air as in ST4)</p> |

Table S2. Regional area limits from Figure 1, as in Alves et al. 2006. LAT—latitude; LON—longitude.

| Area | LAT (°)     | LON (°)                        |
|------|-------------|--------------------------------|
| ETSI | 78°S – 25°S | 21°E – 145°E                   |
| ETSP | 78°S – 25°S | 145°E – 70°W                   |
| ETSA | 78°S – 25°S | 69°W – 20°E                    |
| TSIO | 24°S – 0°   | 21°E – (100°E (N); 135°E (S))  |
| TWSP | 24°S – 0°   | (101°E (N); 136°E (S)) – 130°W |
| TESP | 24°S – 0°   | 129°W – 65°W                   |
| TSAO | 24°S – 0°   | 64°W – 20°E                    |
| TNIO | 1°N – 30°N  | 41°E – 100°E                   |
| TWNP | 1°N – 30°N  | 101°E – 180°E                  |
| TENP | 1°N – 30°N  | Land                           |
| TNAO | 1°N – 38°N  | (101°W (N); 69°W (S)) – 40°E   |
| ETNP | 31°N – 78°N | 101°E – 102°W                  |
| ETNA | 39°N – 78°N | 101°W – 100°E                  |

Table S3. M-Scores skill assessment of the 95% percentile PC20-E and ensemble members, against ERA5, for global and adopted sub-regions.

| Area   | ST2 | ST3 | ST4 | ST6 | Ensemble |
|--------|-----|-----|-----|-----|----------|
| ETSA   | 804 | 764 | 776 | 794 | 831      |
| ETSP   | 734 | 799 | 803 | 817 | 851      |
| ETSI   | 829 | 715 | 722 | 758 | 805      |
| ETNA   | 798 | 886 | 897 | 900 | 901      |
| ETNP   | 870 | 877 | 888 | 889 | 910      |
| TNAO   | 772 | 931 | 939 | 895 | 914      |
| TSAO   | 593 | 875 | 913 | 764 | 825      |
| TENP   | 736 | 616 | 805 | 832 | 849      |
| TWNP   | 729 | 834 | 835 | 828 | 836      |
| TESP   | 387 | 633 | 777 | 593 | 706      |
| TWSP   | 571 | 869 | 830 | 731 | 769      |
| TNIO   | 769 | 864 | 896 | 869 | 881      |
| TSIO   | 699 | 849 | 925 | 856 | 897      |
| GLOBAL | 856 | 878 | 888 | 893 | 911      |
